# Supplementary material for: High-throughput screening for amyloid-β binding natural small-molecules based on the combinational use of biolayer interferometry and UHPLC−DAD-Q/TOF-MS/MS
Source: PubMed Central journal article supplement — Acta Pharm Sin B. 2021 Sep 4;12(4):1723–39. doi: 10.1016/j.apsb.2021.08.030 (PMC9279722; doi:10.1016/j.apsb.2021.08.030), 2021-09-04
Supplement: mmc1.pdf [file mmc1.pdf]

## Supporting Information for

### Original article

## High-throughput screening for amyloid- $\beta$ binding natural small-molecules based on the combinational use of bilayer interferometry and UHPLC–DAD-Q/TOF-MS/MS

Minsong Guo<sup>a,†</sup>, Fengdan Zhu<sup>a,†</sup>, Wenqiao Qiu<sup>a,c,†</sup>, Gan Qiao<sup>a</sup>, Betty Yuen-Kwan Law<sup>b</sup>, Lu Yu<sup>a</sup>, Jianming Wu<sup>a</sup>, Yong Tang<sup>a,b</sup>, Chonglin Yu<sup>a</sup>, Dalian Qin<sup>a,\*</sup>, Xiaogang Zhou<sup>a,\*</sup>, Anguo Wu<sup>a,\*</sup>

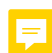

<sup>a</sup>*Sichuan Key Medical Laboratory of New Drug Discovery and Druggability Evaluation, Luzhou Key Laboratory of Activity Screening and Druggability Evaluation for Chinese Materia Medica, School of Pharmacy; Education Ministry Key Laboratory of Medical Electrophysiology; College of Preclinical Medicine; Southwest Medical University, Luzhou 646000, China*

<sup>b</sup>*State Key Laboratory of Quality Research in Chinese Medicine, Macau University of Science and Technology, Taipa, Macau 999078, China*

<sup>c</sup>*Department of Neurosurgery Sichuan Provincial People's Hospital, University of Electronic Science and Technology of China, Chengdu 610000, China*

Received 5 May 2021; received in revised form 11 August 2021; accepted 24 August 2021

\*Corresponding authors. Tel./fax: +86 17769617417.

E-mail addresses: [zxg@swmu.edu.cn](mailto:zxg@swmu.edu.cn) (Xiaogang Zhou), [dalianqin@swmu.edu.cn](mailto:dalianqin@swmu.edu.cn) (Dalian Qin), [wuanguo@swmu.edu.cn](mailto:wuanguo@swmu.edu.cn) (Anguo Wu).

<sup>†</sup>These authors made equal contributions to this work.

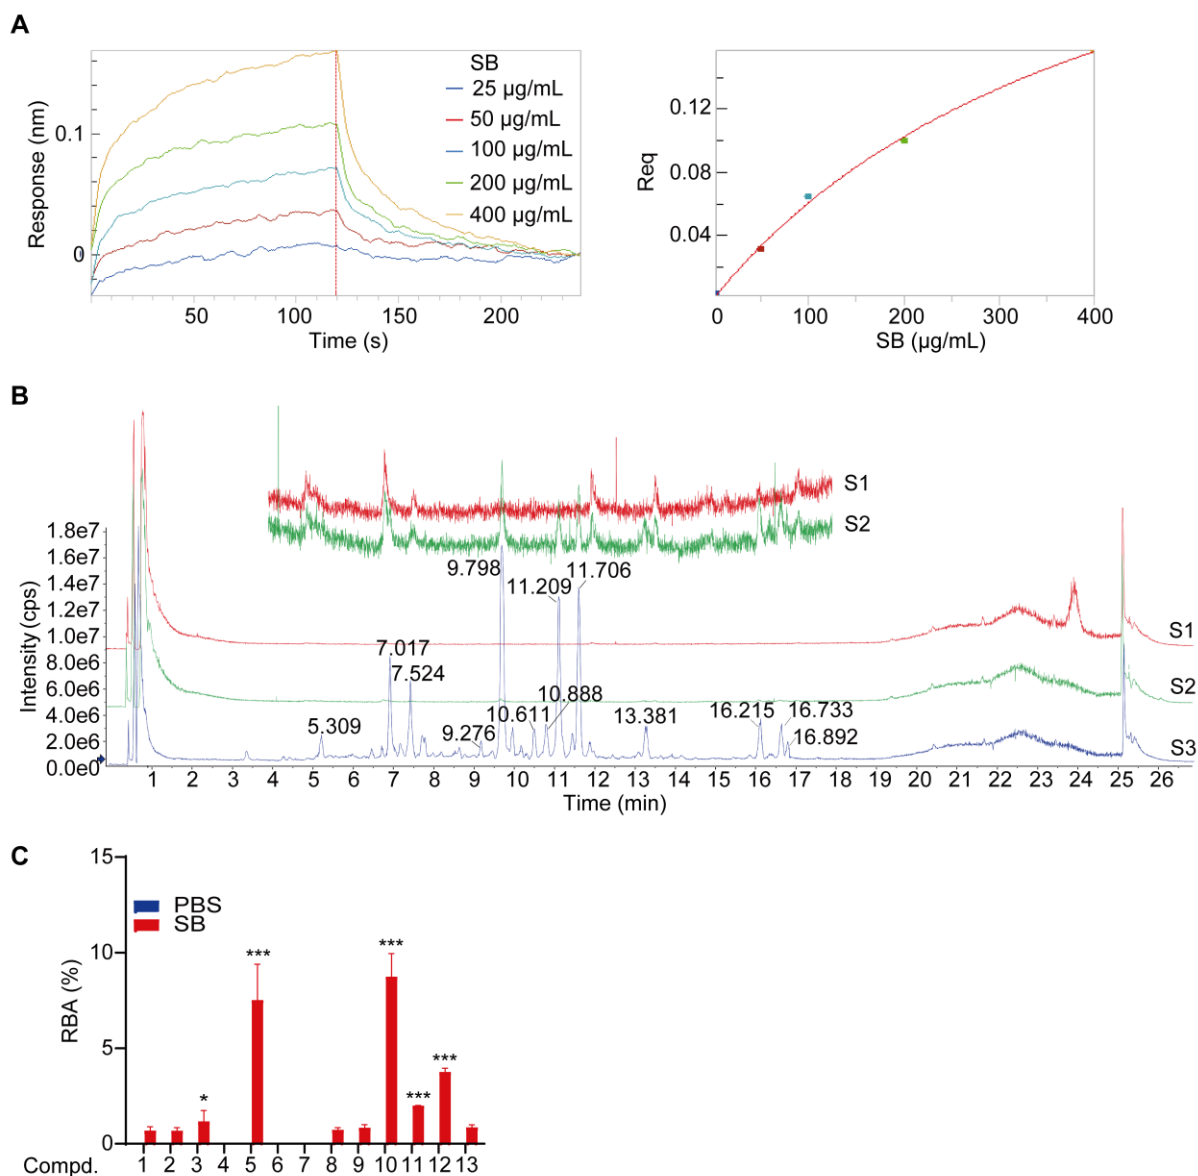

**Figure S1** Screening of  $A\beta$  binding components in SB by the combinational use of BLI and UHPLC–DAD–Q/TOF–MS/MS. (A) Real-time kinetic binding sensorgrams of different concentrations of SB increasing from 25 to 400  $\mu\text{g/mL}$  were shown. Response (nm) indicates the optical thickness on the SA biosensor layer. The equilibrium binding signal ( $R_{eq}$ ) revealed by the flattened curve is reached. (B) The total ion chromatograms (TICs) were recorded by UHPLC–DAD–Q/TOF–MS/MS instrument. S1: The dissociation buffer without SB extract; S2: The dissociation buffer with SB extract; S3: SB extract used for the BLI assay. (C) The bar chart indicates the RBA of the detected components in SB. All data are representative of at least three independent experiments and are presented as mean  $\pm$  SD.  $n=3$ . \* $P < 0.05$ , \*\*\* $P < 0.001$  compared with the components without RBA.

**Table S1** The binding affinity ( $K_D$ ), association rate constant ( $K_{on}$ ), and dissociation rate constant ( $K_{dis}$ ) of SB to  $A\beta_{1-42}$ .

| TCM        | $K_D$ ( $\mu\text{g/mL}$ ) | $K_{on}$ ( $\text{L/mol}\cdot\text{s}$ ) | $K_{dis}$ ( $1/\text{s}$ ) |
|------------|----------------------------|------------------------------------------|----------------------------|
| SB extract | 199                        | $6.18 \times 10^2$                       | $1.23 \times 10^{-1}$      |

**Table S2** The main detected components in SB and their RBA (%) with  $A\beta$ .

| Compd. | RT (min) | $[M-H]^-$ | Formula              | MW  | Chemical name                                                                                               | RBA (%) |
|--------|----------|-----------|----------------------|-----|-------------------------------------------------------------------------------------------------------------|---------|
| 1      | 5.309    | 303.0613  | $C_{15}H_{12}O_7$    | 304 | (2 <i>R</i> ,3 <i>R</i> )-3,5,7,2',6'-pentahydroxyflavanone                                                 | 0.69    |
| 2      | 7.017    | 547.1647  | $C_{26}H_{28}O_{13}$ | 548 | Chrysin 6- <i>C</i> -arabinose-8- <i>C</i> -glucose                                                         | 0.67    |
| 3      | 7.524    | 547.1653  | $C_{26}H_{28}O_{13}$ | 548 | Chrysin 6- <i>C</i> -glucose-8- <i>C</i> -arabinose                                                         | 1.17    |
| 4      | 9.276    | 475.1049  | $C_{22}H_{20}O_{12}$ | 476 | Hispidulin 7-glucuronide                                                                                    | 0       |
| 5      | 9.798    | 445.0936  | $C_{21}H_{18}O_{11}$ | 446 | Baicalin                                                                                                    | 7.52    |
| 6      | 10.611   | 445.0933  | $C_{21}H_{18}O_{11}$ | 446 | Norwogonin 7- <i>O</i> - $\beta$ -D-glucuronide (5,8-dihydroxyflavone 7- <i>O</i> - $\beta$ -D-glucuronide) | 0       |
| 7      | 10.888   | 475.1051  | $C_{22}H_{20}O_{12}$ | 476 | 5,7,8-Tetrahydroxyflavone; 6-Me ether,7- <i>O</i> - $\beta$ -D-glucuronopyranoside                          | 0       |
| 8      | 11.209   | 459.1092  | $C_{22}H_{20}O_{11}$ | 460 | Oroxyloside                                                                                                 | 0.73    |
| 9      | 11.706   | 459.1087  | $C_{22}H_{20}O_{11}$ | 460 | Wogonoside                                                                                                  | 0.83    |
| 10     | 13.381   | 269.0553  | $C_{15}H_{10}O_5$    | 270 | Baicalein                                                                                                   | 8.74    |
| 11     | 16.215   | 283.0711  | $C_{16}H_{12}O_5$    | 284 | Wogonin                                                                                                     | 1.99    |
| 12     | 16.733   | 373.1106  | $C_{19}H_{18}O_8$    | 374 | Skullcapflavone II                                                                                          | 3.76    |
| 13     | 16.892   | 283.0711  | $C_{16}H_{12}O_5$    | 284 | Oroxylin A                                                                                                  | 0.85    |

Note: RT, retention time; MW, molecular weight; RBA, relative binding amount.
